# Supplementary material
Source: HighWire-hosted journal article supplement (https://www.life-science-alliance.org/content/5/2/e202101278/F5)

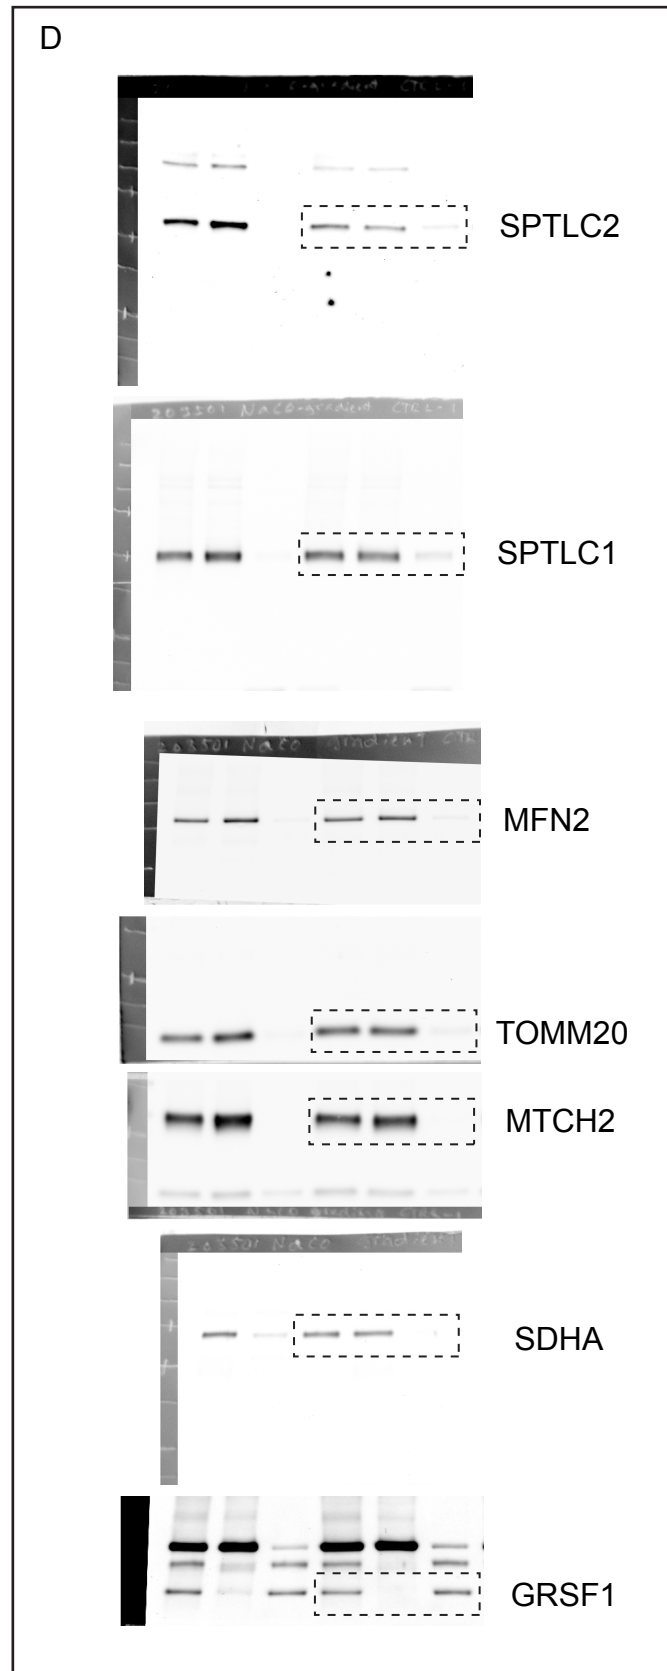

Source Data - Figure EV2

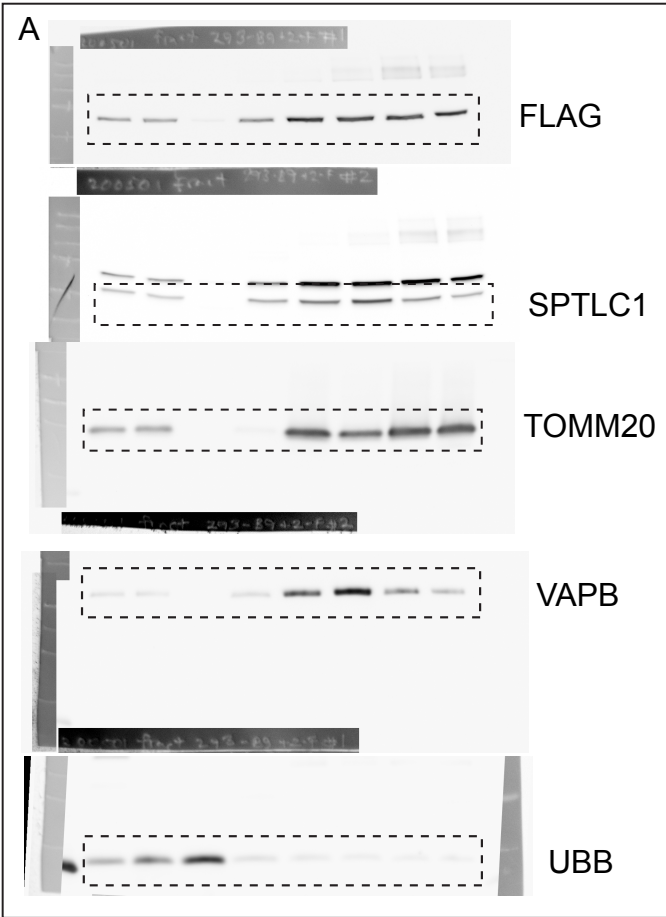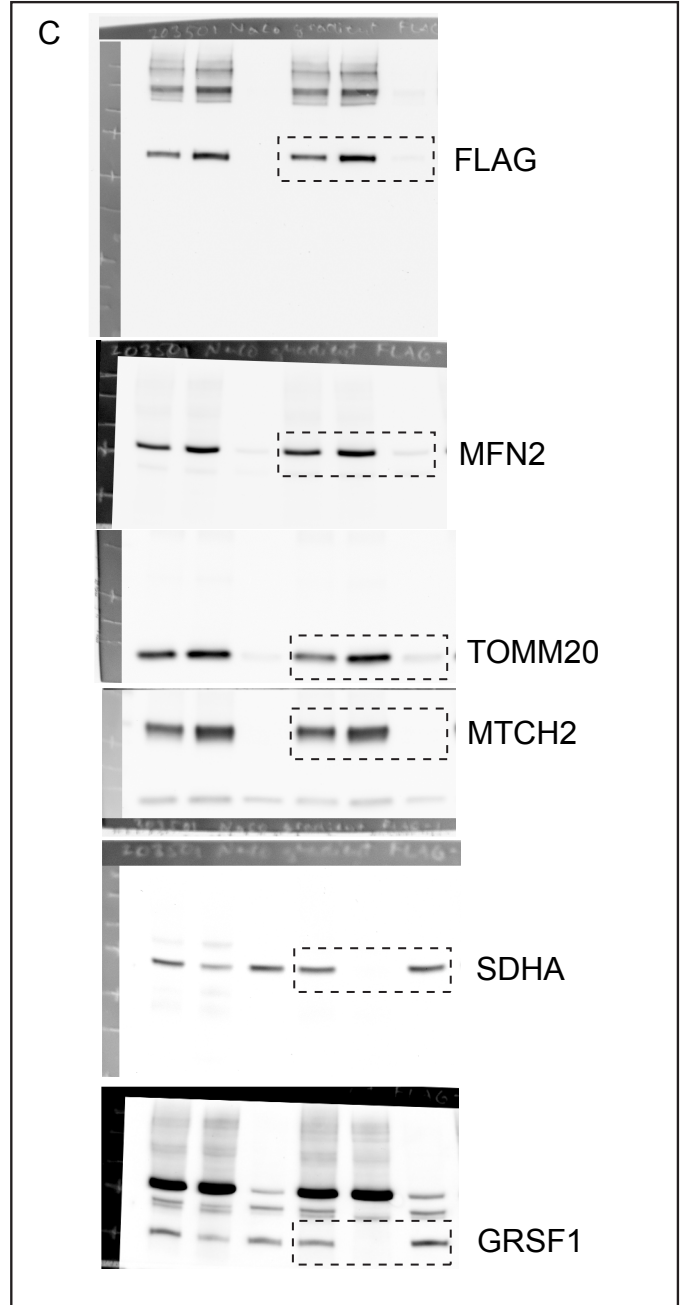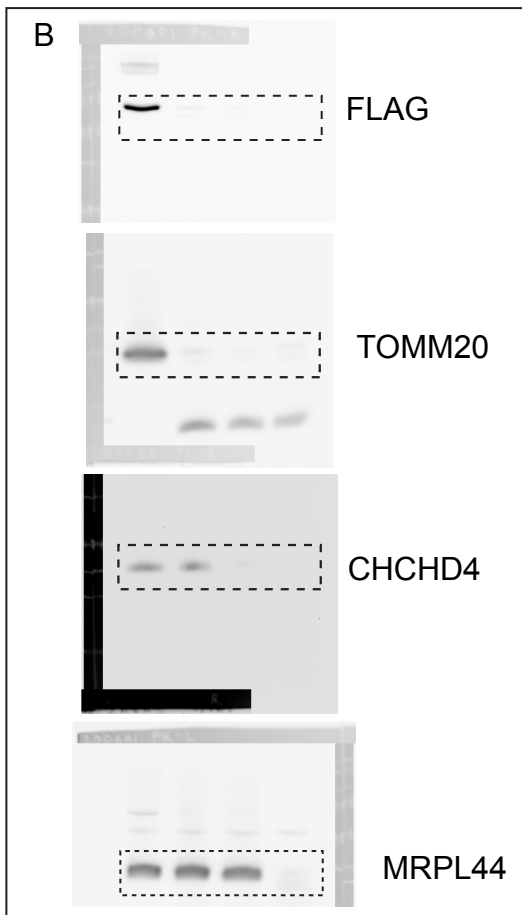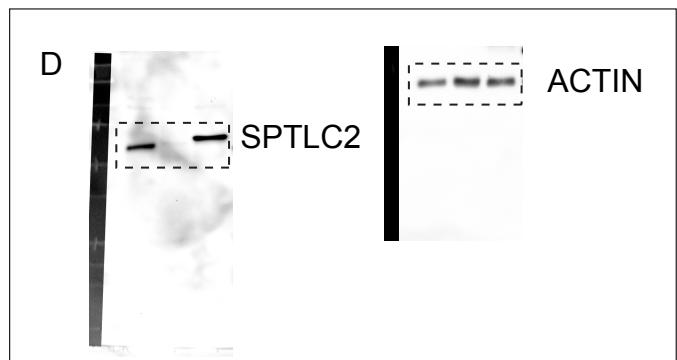

Source Data - Figure EV3

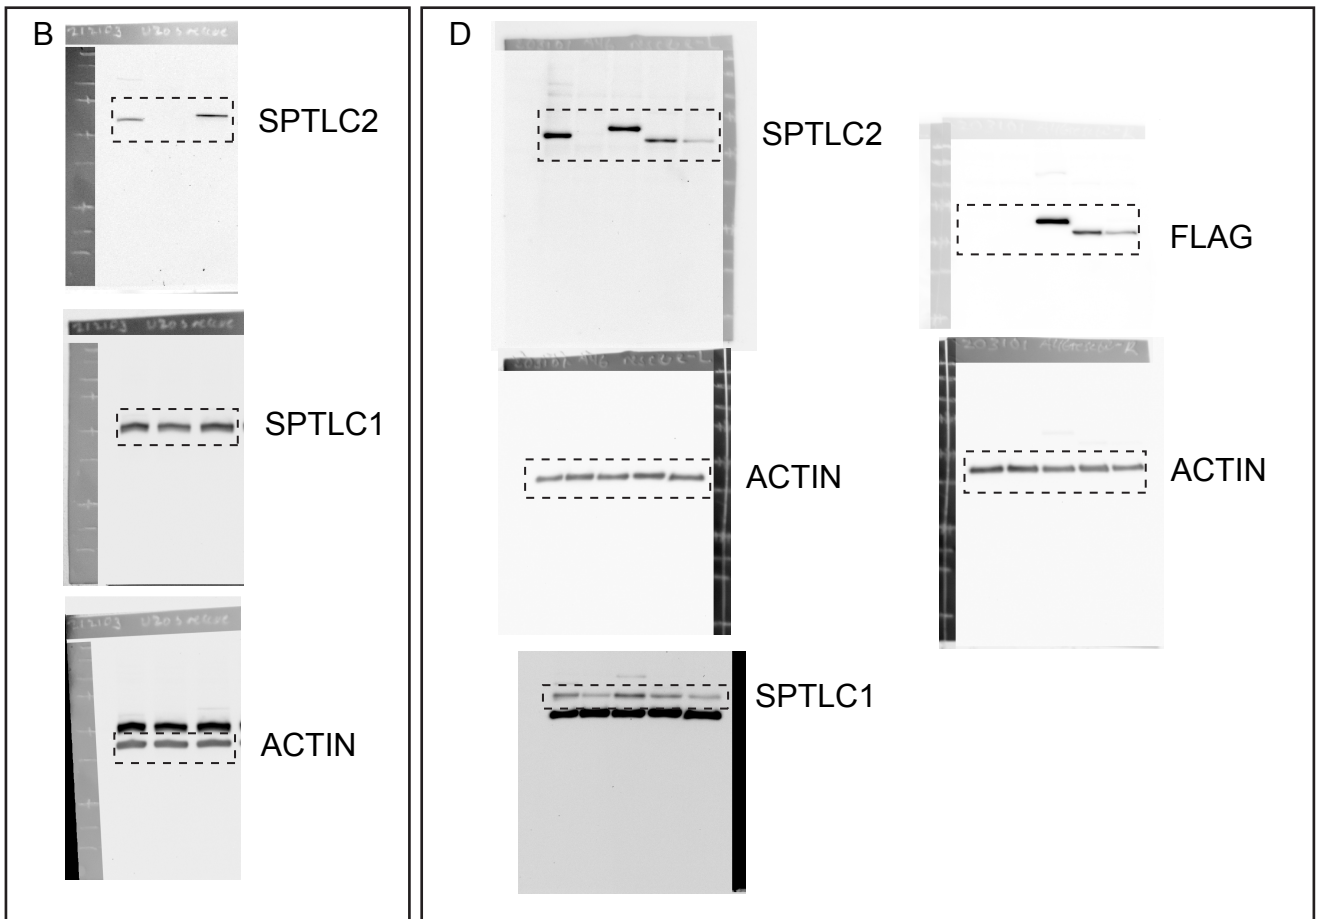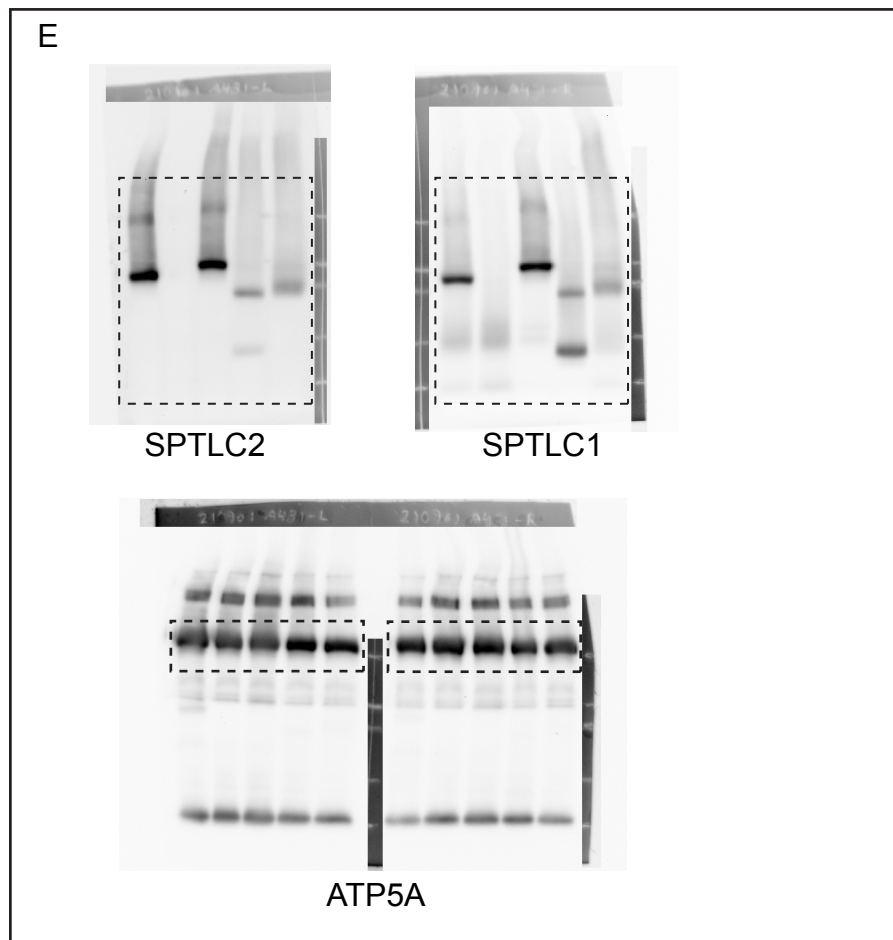

Source Data - Figure EV4

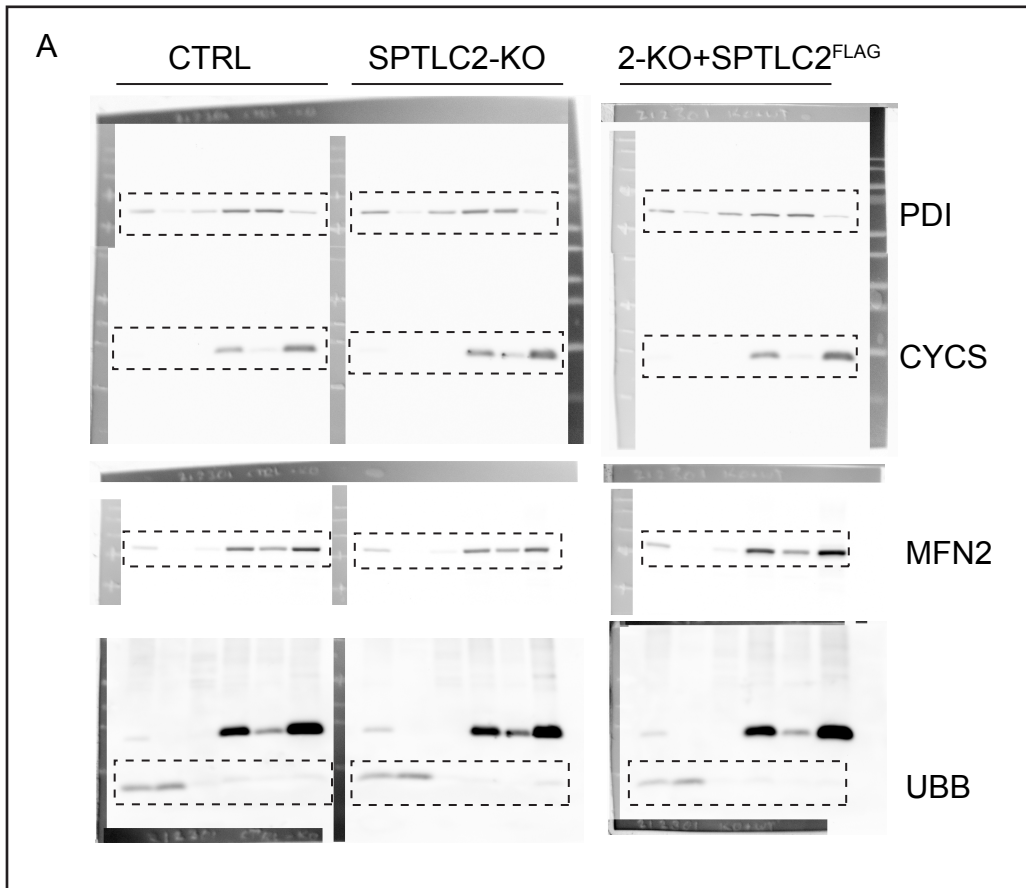

Supplement: inline-supplementary-material-8 [file inline-supplementary-material-8.pdf]
